# Supplementary material
Source: PubMed Central journal article supplement (PMC2270311)

A

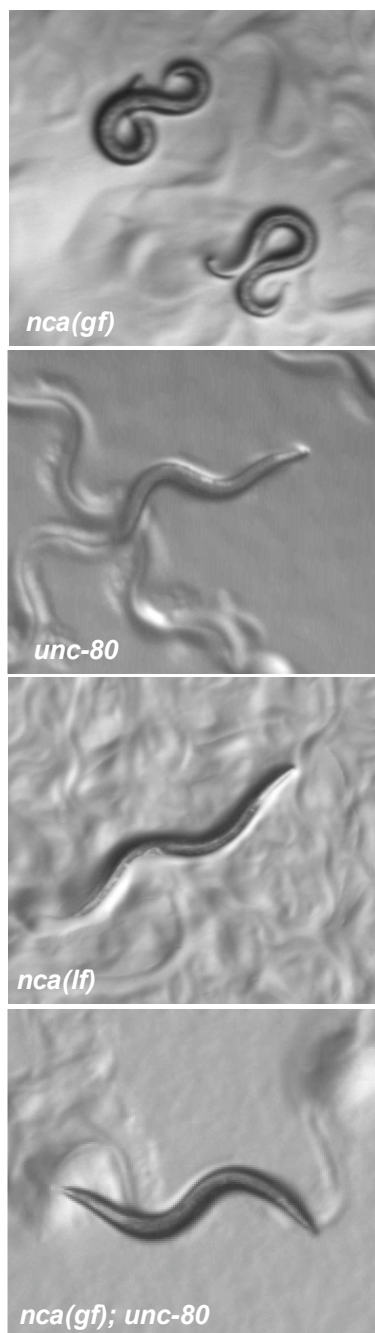

B

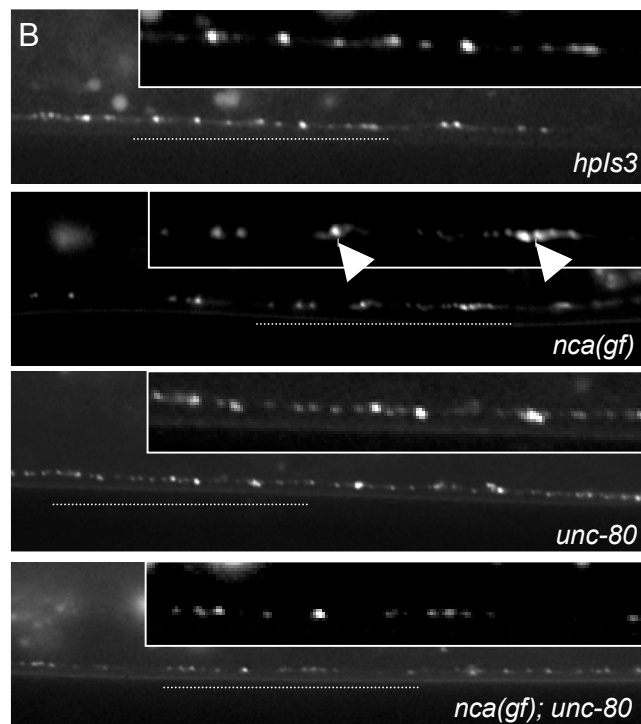

C

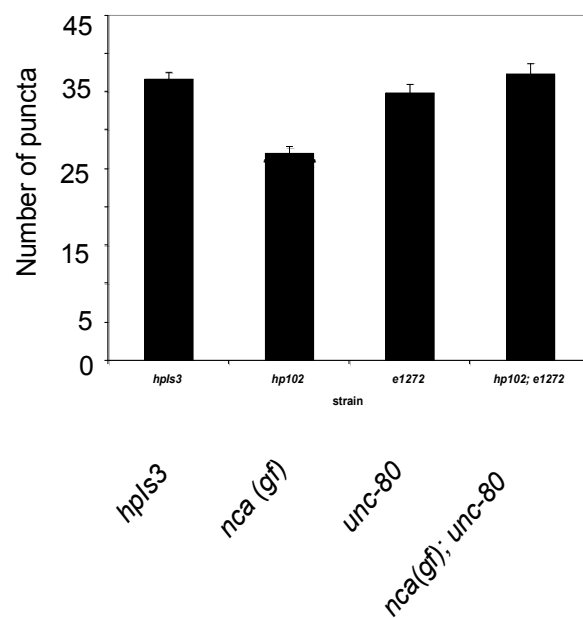

D

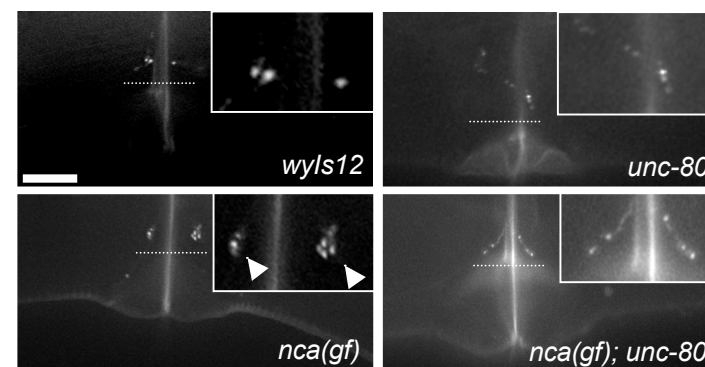

E

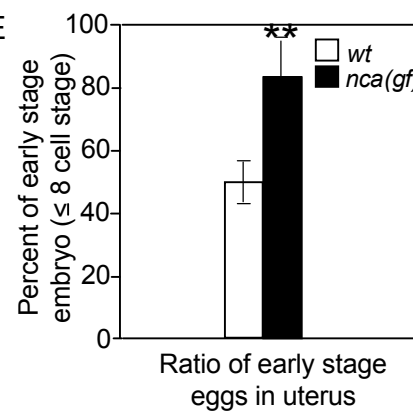

F

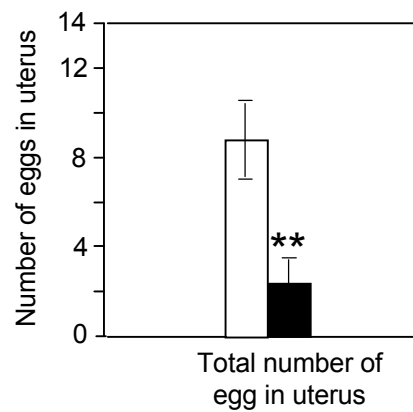

Supplement: pbio.0060055.sg001.pdf [file pbio.0060055.sg001.pdf]

A Cell body

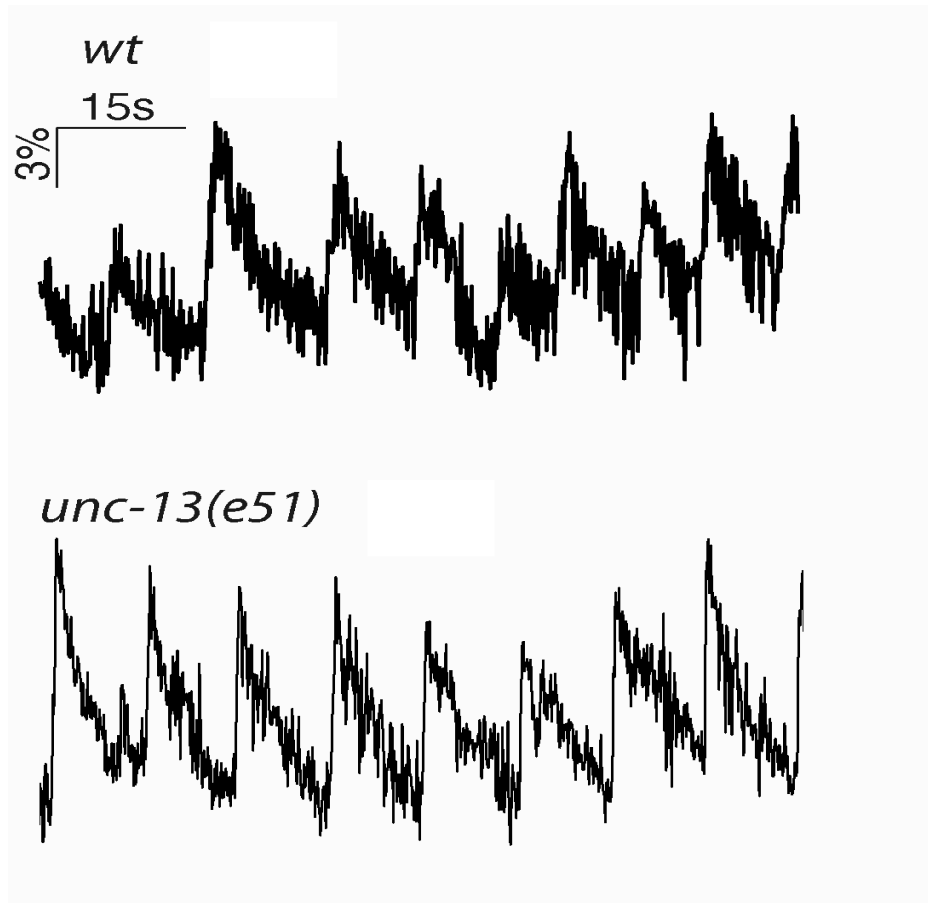

B Spike Frequency

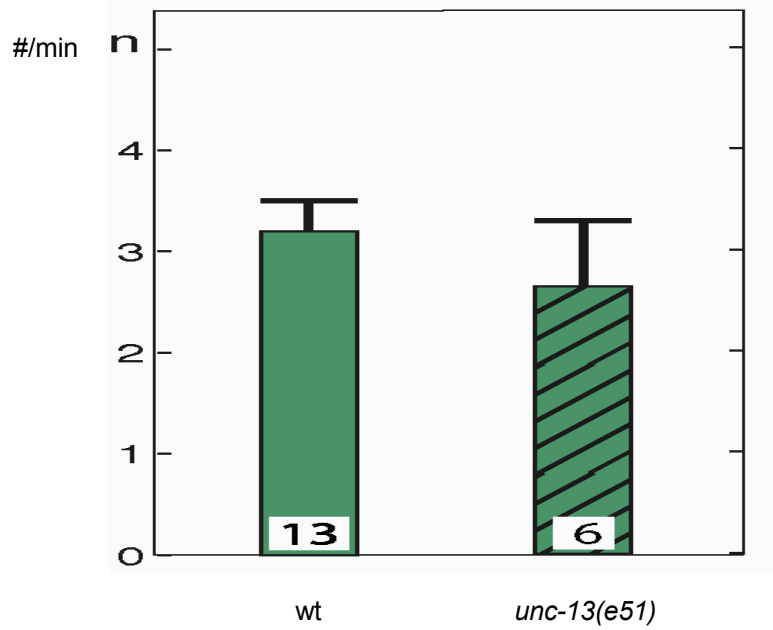

Supplement: pbio.0060055.sg002.pdf [file pbio.0060055.sg002.pdf]

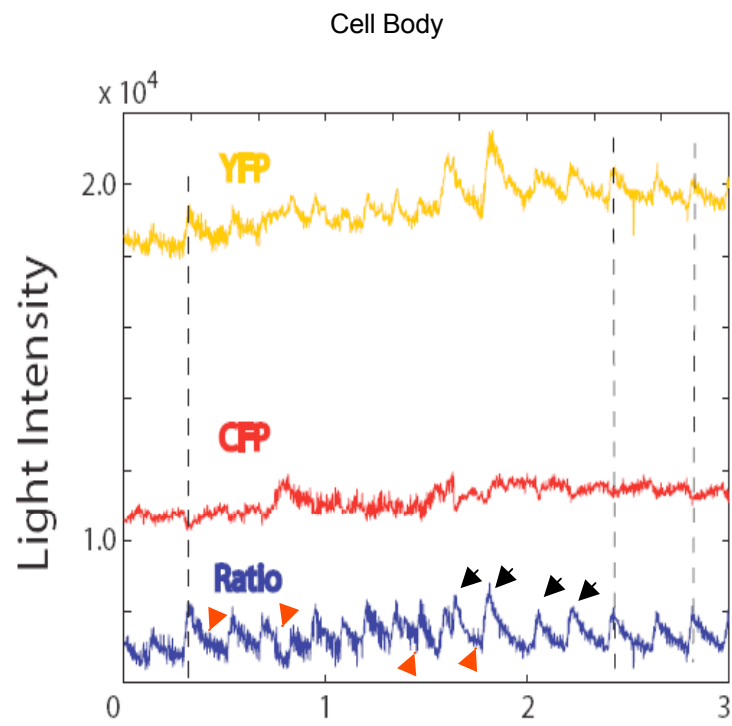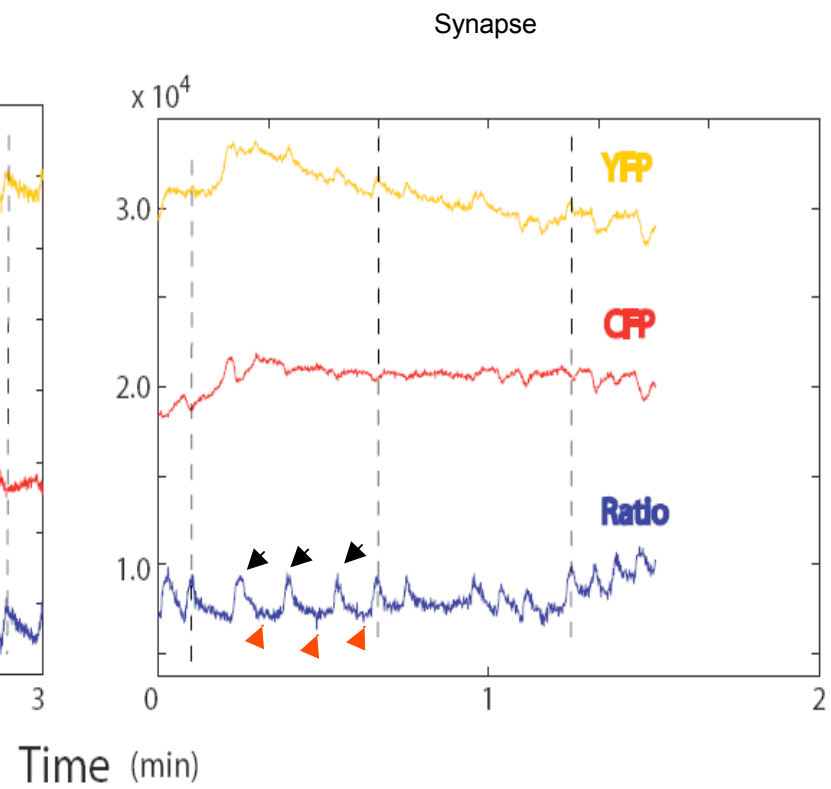

Supplement: pbio.0060055.sg003.pdf [file pbio.0060055.sg003.pdf]

**A**

*unc-80/F25C8.3*

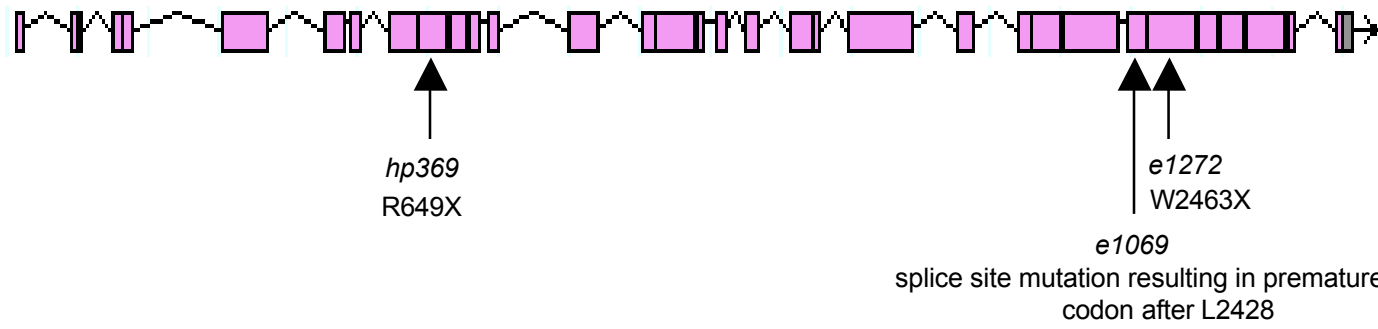

**B**

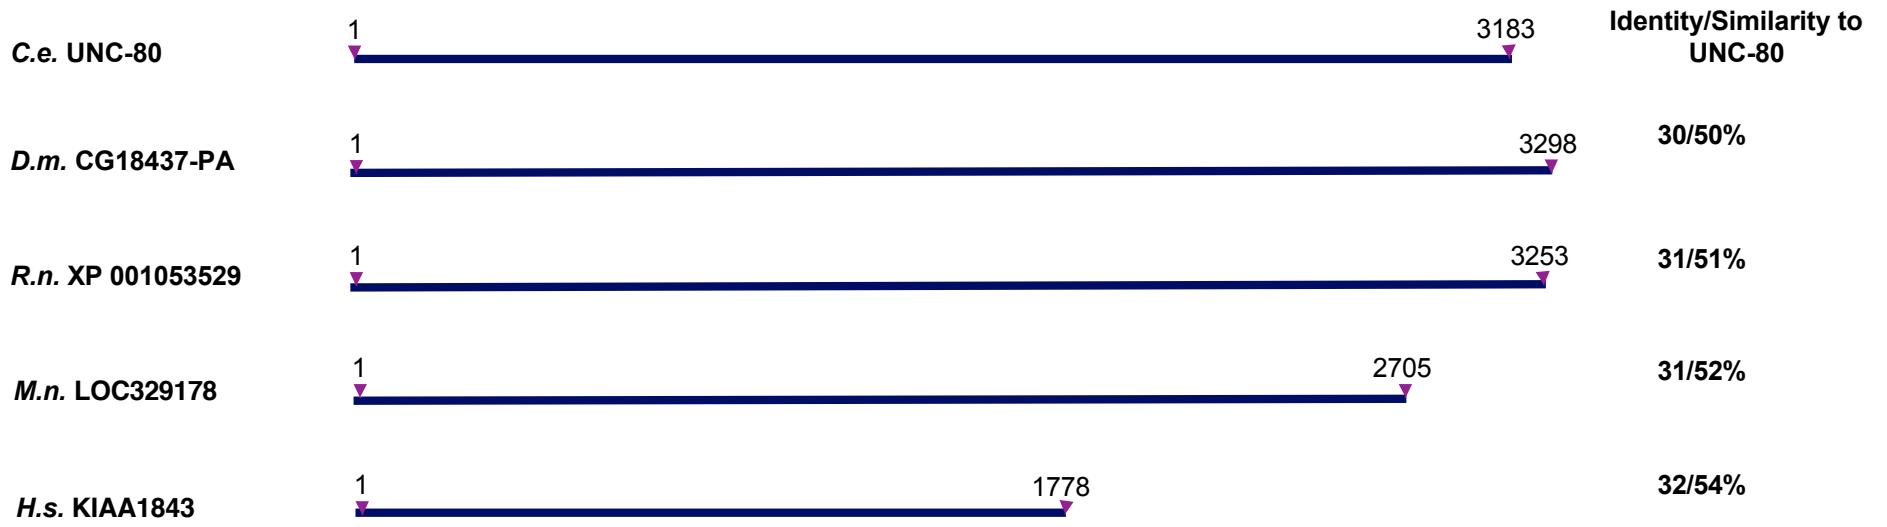

Supplement: pbio.0060055.sg004.pdf [file pbio.0060055.sg004.pdf]

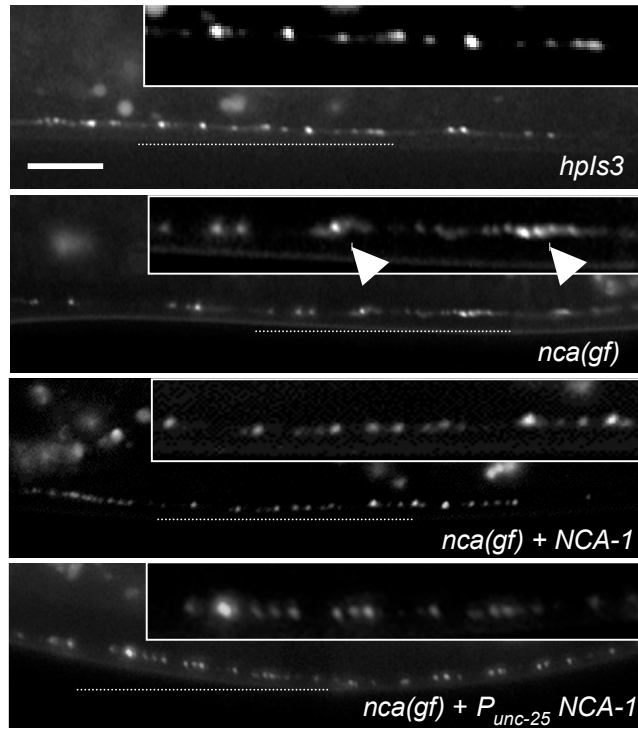

Supplement: pbio.0060055.sg005.pdf [file pbio.0060055.sg005.pdf]

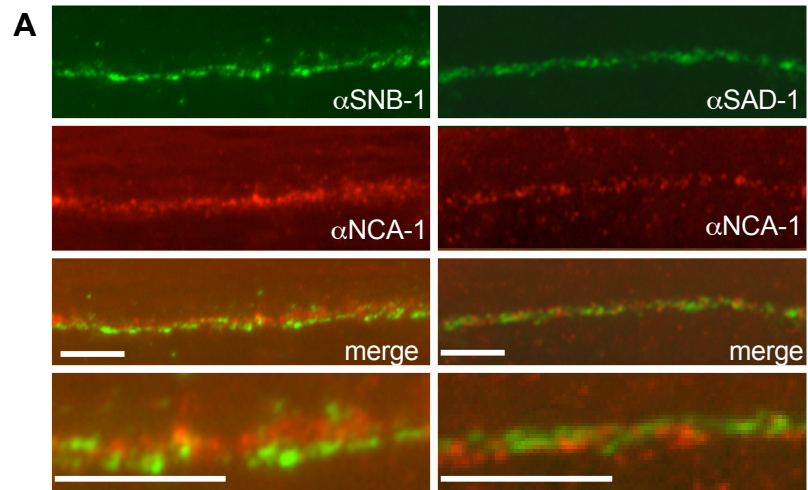

wild type

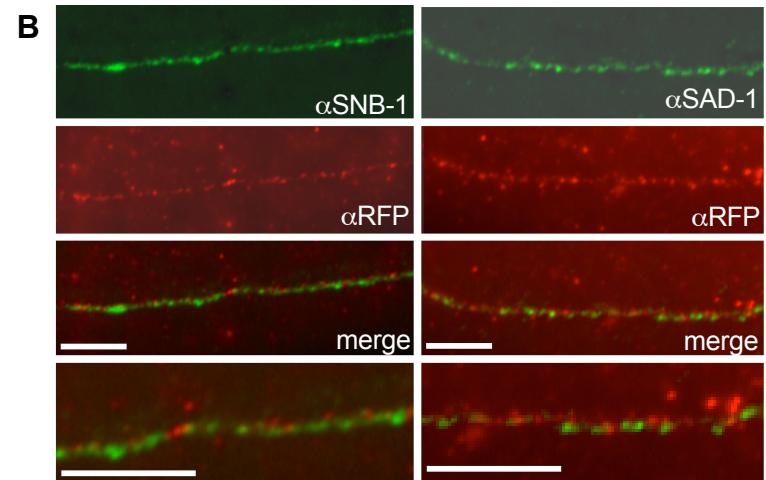

*hpls98*

Supplement: pbio.0060055.sg006.pdf [file pbio.0060055.sg006.pdf]

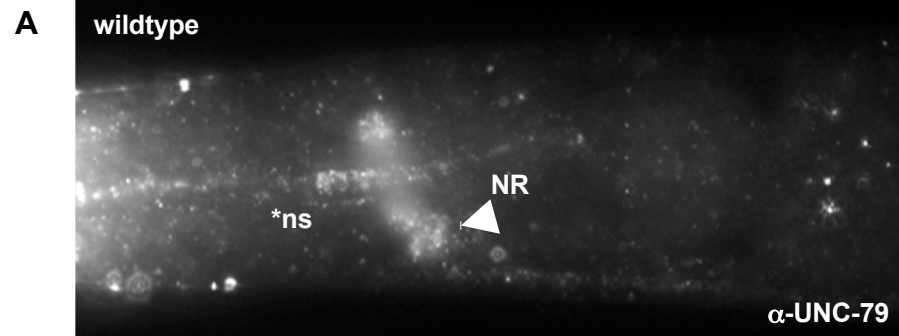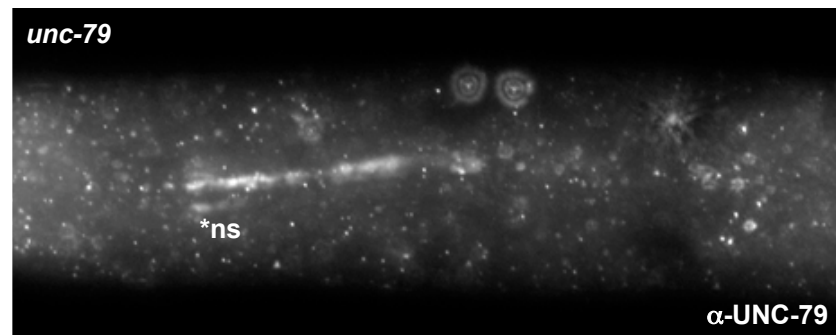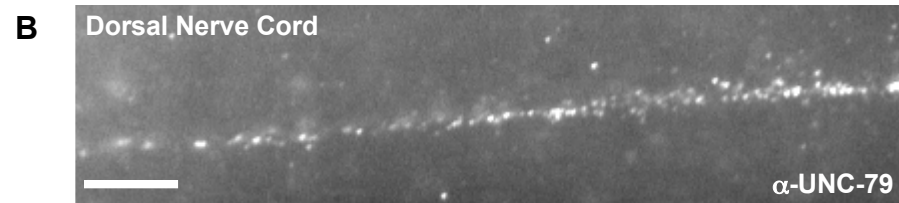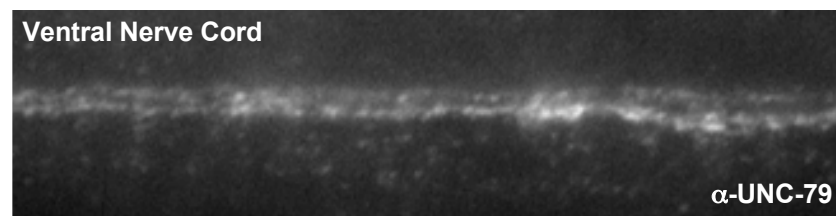

Supplement: pbio.0060055.sg008.pdf [file pbio.0060055.sg008.pdf]

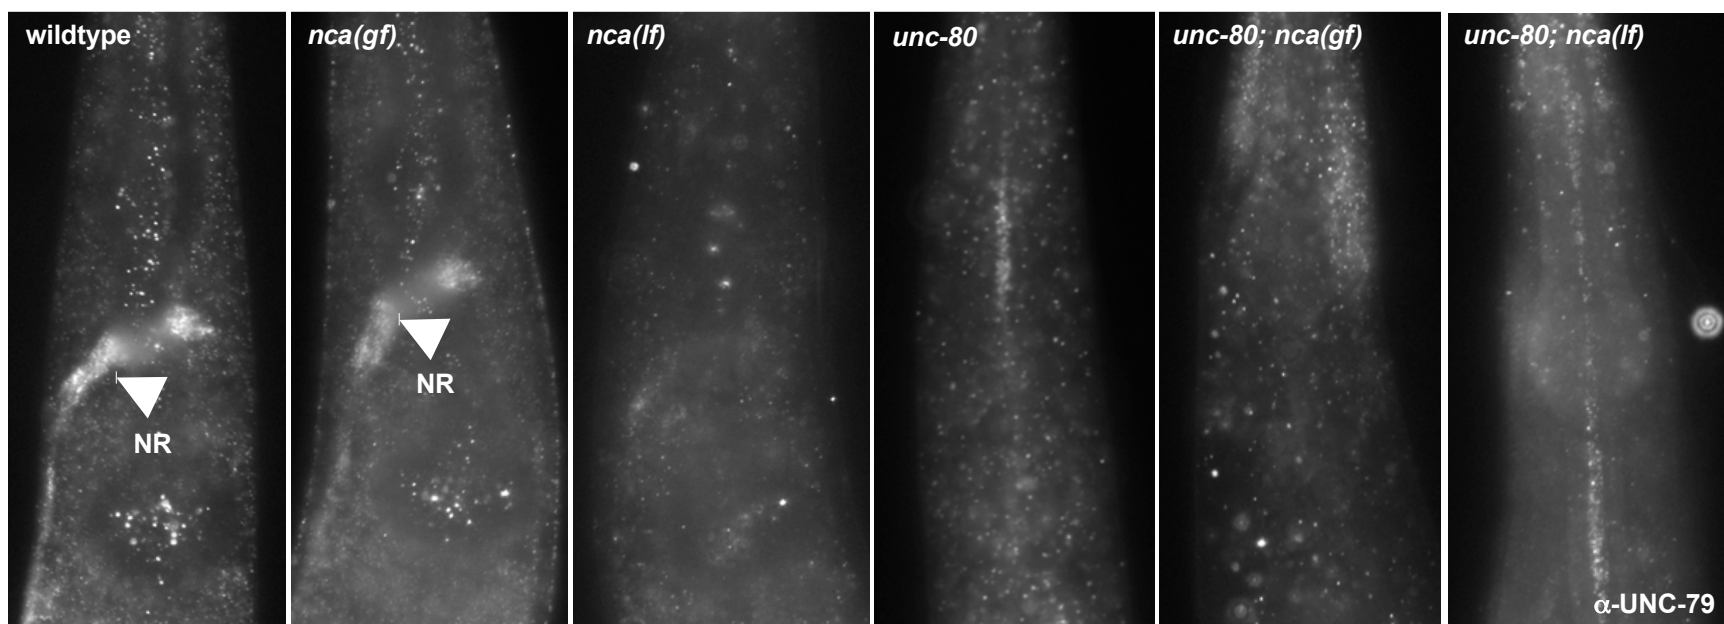

Supplement: pbio.0060055.sg009.pdf [file pbio.0060055.sg009.pdf]
